# Supplementary material for: CRISPR/Cas9-mediated editing of double loci of BnFAD2 increased the seed oleic acid content of rapeseed (Brassica napus L.)
Source: Front Plant Sci. 2022 Nov 22;13:1034215. doi: 10.3389/fpls.2022.1034215 (PMC9723152; doi:10.3389/fpls.2022.1034215)
Supplement: Supplementary file 5 [file Table_1.xlsx]

## Sheet: Sheet1
Table S1 Primers used in the present study
primers	Sequences (5' to 3')	Purpose
BnFAD2T1-F	gtcAGTTCTCCGACAGTGAAGGG	Construction for BnaA05.FAD2 and BnaC05.FAD2 targeting
BnFAD2T1-R	aaacCCCTTCACTGTCGGAGAAC
BnFAD2T2-F	gtcaCGACGCCACCATTCCAACAC
BnFAD2T2-R	aaacGTGTTGGAATGGTGGCGTCG
BnFAD2T3-F	attgTACTTAGCCTTCAACGTCTC
BnFAD2T3-R	aaacGAGACGTTGAAGGCTAAGTA
PB-L	GCGCGCgGTctcGCTCGACTAGTATGG	Transgenic positive detection
PB-R	GCGCGCggtctcTACCGACGCGTATCC
NP7	CTGTAGCGTATCAAATCTCGTTC	Amplification the fragment containing BnaC05.FAD2 target site
NP8	ATGCCACATTGAGGTAGTTCG
NP9	TGACAATAGAGTTGCTCTCAACTGT	Amplification the fragment containing BnaA05.FAD2 target site
NP10	GCTAAGCCATTACACTGTTCAGG
NP11	AGTCTTTGCTTTTGGCTTATGC	Sequencing primers
NP12	AGCCGAGAGTGAACTGAACCG
FAD2-C5 F	GATGGTCTGCTTCTACGGAGTC	Primers for qRT-PCR
FAD2-C5 R	CGTAGTCTCTGTCAACGGTAGC
FAD2-A5 F	CTGAAACCGACAACATCAAGCG
FAD2-A5 R	GGCTATGATGATGTCCCAGATG
FAD2-A1 F	CCTGGAAGTACATCCATGACG
FAD2-A1 R	CGAGACGTTGAAGGCTAAGTAC
FAD2-C1 F	CTTCTCCTGGAAGTACAGCC
FAD2-C1 R	CTAGCGGGTTGTTGAGGTAC
BnACT F	CGAAGGTTATGCTCTTCCTC
BnACT R	CACCGAAGAACTCTTAG
