# Supplementary material for: CRISPR/Cas9-mediated editing of double loci of BnFAD2 increased the seed oleic acid content of rapeseed (Brassica napus L.)
Source: Front Plant Sci. 2022 Nov 22;13:1034215. doi: 10.3389/fpls.2022.1034215 (PMC9723152; doi:10.3389/fpls.2022.1034215)
Supplement: Supplementary file 6 [file Table_2.xlsx]

## Sheet: Sheet1
GCCTTCCAGGGGCCCGCGTAGGCGATGCCGGCGACCTCGCCGTCCACCTCGGCGACGAGCCAGGGATAGC
GCTCCCGCAGACGGACGAGGTCGTCCGTCCACTCCTGCGGTTCCTGCGGCTCGGTACGGAAGTTGACCGT
GCTTGTCTCGATGTAGTGGTTGACGATGGTGCAGACCGCCGGCATGTCCGCCTCGGTGGCACGGCGGATG
TCGGCCGGGCGTCGTTCTGGGCTCATGGTAGACTCGAGAGAGATAGATTTGTAGAGAGAGACTGGTGATT
TCAGCGTGTCCTCTCCAAATGAAATGAACTTCCTTATATAGAGGAAGGGTCTTGCGAAGGATAGTGGGAT
TGTGCGTCATCCCTTACGTCAGTGGAGATATCACATCAATCCACTTGCTTTGAAGACGTGGTTGGAACGT
CTTCTTTTTCCACGATGCTCTTCGTGGGTGGGGGTCCATCTTTGGGACCACTGTCGGCAGAGGCATCTTG
AACGATAGCCTTTCCTTTATCGCAATGATGGCATTTGTAGGTGCCACCTTCCTTTTCTACTGTCCTTTTG
ATGAAGTGACAGATAGCTGGGCAATGGAATCCGAGGAGGTTTCCCGATATTACCCTTTGTTGAAAAGTCT
CAATAGCCCTTTGGTCTTCTGAGACTGTATCTTTGATATTCTTGGAGTAGACGAGAGTGTCGTGCTCCAC
CATGTTCACATCAATCCACTTGCTTTGAAGACGTGGTTGGAACGTCTTCTTTTTCCACGATGCTCCTCGT
GGGTGGGGGTCCATCTTTGGGACCACTGTCGGCAGAGGCATCTTGAACGATAGCCTTTCCTTTATCGCAA
TGATGGCATTTGTAGGTGCCACCTTCCTTTTCTACTGTCCTTTTGATGAAGTGACAGATAGCTGGGCAAT
GGAATCCGAGGAGGTTTCCCGATATTACCCTTTGTTGAAAAGTCTCAATAGCCCTTTGGTCTTCTGAGAC
TGTATCTTTGATATTCTTGGAGTAGACGAGAGTGTCGTGCTCCACCATGTTGGCAAGCTGCTCTAGCCAA
TACGCAAACCGCCTCTCCCCGCGCGTTGGCCGATTCATTAATGCAGCTGGCACGACAGGTTTCCCGACTG
GAAAGCGGGCAGTGAGCGCAACGCAATTAATGTGAGTTAGCTCACTCATTAGGCACCCCAGGCTTTACAC
TTTATGCTTCCGGCTCGTATGTTGTGTGGAATTGTGAGCGGATAACAATTTCACACAGGAAACAGCTATG
ACATGATTACGAATTCGAGCTCGGTACCGTAACTATAACGGTCCTAAGGTAGCGAAGGATCCGCTCGCTA
CCTTAAGAGAGGATATCCCTCCATCCTATAATGTAGGCTATAGGAACTAGGGCAAGGCCGGCCTTATGCG
GCCGCGTCACTGGATTTTGGTTTTAGGAATTAGAAATTTTATTGATAGAAGTATTTTACAAATACAAATA
CATACTAAGGGTTTCTTATATGCTCAACACATGAGCGAAACCCTATAAGAACCCTAATTCCCTTATCTGG
GAACTACTCACACATTATTCTGGAGAAAAATAGAGAGAGATAGATTTGTAGAGAGAGACTGGTGATTTTT
GCGGACTCTAGATCAGGTGGATCCTACTTCTTTTTCTTAGCCTGTCCGGCCTTTTTGGTGGCAGCAGGAC
GCTTATCACCACCAAGCTGGGAAAGGTCGATACGAGTCTCGTAAAGACCGGTGATGGACTGGTGGATGAG
AGTAGCGTCGAGAACCTCCTTGGTGGACGTGTAACGCTTCCTGTCGATGGTGGTGTCGAAGTACTTGAAA
GCAGCAGGGGCGCCGAGGTTCGTGAGCGTGAAGAGGTGGATGATGTTCTCGGCCTGCTCGCGGATGGGCT
TGTCGCGGTGCTTGTTGTAGGCGGAGAGGACCTTGTCGAGGTTAGCGTCAGCGAGGATGACGCGCTTGGA
GAACTCGGAGATCTGCTCGATGATCTCGTCGAGGTAGTGCTTGTGCTGCTCCACGAAGAGCTGCTTCTGC
TCGTTATCCTCAGGGGAACCCTTGAGCTTCTCGTAGTGGGAGGCGAGGTAGAGGAAGTTCACGTACTTGG
AAGGAAGAGCAAGCTCGTTACCCTTCTGGAGCTCACCAGCGGAAGCCAGCATCCTCTTACGACCGTTCTC
GAGCTCGAAAAGAGAGTACTTGGGGAGCTTGATGATGAGGTCCTTCTTGACCTCCTTGTAGCCCTTGGCC
TCGAGGAAGTCGATCGGGTTCTTCTCGAAGGAGGAGCGCTCCATGATGGTGATGCCGAGGAGCTCCTTGA
CGGACTTGAGCTTCTTCGACTTACCCTTCTCCACCTTGGCGACCACGAGGACGGAGTAGGCGACAGTAGG
GGAGTCGAAACCACCGTACTTCTTAGGGTCCCAATCCTTCTTCCTAGCGATGAGCTTGTCCGAGTTTCTC
TTTGGAAGGATAGACTCCTTGGAGAAGCCACCGGTCTGGACCTCGGTCTTCTTGACGATGTTAACCTGAG
GCATAGAAAGGACCTTGCGAACAGTAGCGAAGTCGCGACCCTTGTCCCAAACGATCTCACCAGTCTCACC
GTTCGTCTCGATAAGAGGGCGCTTGCGGATCTCGCCGTTGGCGAGGGTGATCTCGGTCTTGAAGAAGTTC
ATGATGTTGGAGTAGAAGAAGTACTTGGCGGTGGCCTTGCCGATCTCCTGCTCGGACTTGGCGATCATCT
TACGAACGTCGTAGACCTTGTAGTCACCGTAGACGAACTCGGACTCAAGCTTAGGGTACTTCTTGATAAG
AGCGGTACCAACGACAGCGTTAAGGTAAGCATCGTGAGCGTGGTGGTAGTTGTTGATCTCGCGGACCTTG
TAGAACTGGAAGTCCTTGCGGAAGTCGGAGACGAGCTTGGACTTGAGGGTGATCACCTTGACCTCGCGGA
TGAGCTTGTCGTTCTCGTCGTACTTGGTGTTCATCCTAGAATCGAGGATCTGAGCAACGTGCTTGGTAAT
CTGCCTCGTCTCAACAAGCTGCCTCTTGATGAAACCAGCCTTGTCAAGCTCGGAAAGGCCACCCCTCTCA
GCCTTCGTGAGGTTGTCGAACTTCCTCTGGGTAATGAGCTTAGCGTTGAGAAGCTGCCTCCAGTAGTTCT
TCATCTTCTTGACAACCTCCTCGGAAGGGACGTTGTCCGACTTACCCCTGTTCTTGTCGGACCTCGTGAG
GACCTTGTTGTCGATGGAGTCATCCTTAAGGAAAGACTGAGGAACAATGTGGTCGACGTCGTAGTCAGAA
AGCCTGTTGATGTCGAGCTCCTGGTCAACGTACATATCCCTACCGTTCTGGAGGTAGTAGAGGTAGAGCT
TCTCGTTCTGGAGCTGGGTGTTCTCGACAGGGTGCTCCTTAAGGATCTGAGAACCAAGCTCCTTGATACC
CTCCTCAATCCTCTTCATGCGCTCCCTCGAGTTCTTCTGACCCTTCTGGGTAGTCTGGTTCTCACGAGCC
ATCTCGATGACGATGTTCTCAGGCTTGTGACGACCCATAACCTTGACAAGCTCATCGACAACCTTAACAG
TCTGAAGGATGCCCTTCTTGATAGCAGGGGAACCAGCAAGGTTAGCAATGTGCTCGTGGAGAGAGTCGCC
CTGACCGGACACCTGAGCCTTCTGAATATCCTCCTTGAAGGTAAGAGAGTCATCGTGGATGAGCTGCATG
AAGTTCCTGTTAGCGAAACCATCAGACTTGAGGAAGTCGAGGATAGTCTTGCCGCTCTGCTTATCCCTGA
TACCGTTGATGAGCTTGCGGGAGAGCCTACCCCAACCGGTGTAACGGCGACGCTTGAGCTGCTTCATAAC
CTTGTCATCGAAGAGATGAGCGTAAGTCTTGAGCCTCTCCTCGATCATCTCCCTATCCTCGAAGAGAGTA
AGAGTGAGGACGATGTCCTCGAGGATGTCCTCGTTCTCCTCGTTGTCGAGGAAGTCCTTGTCCTTGATGA
TCTTGAGGAGATCGTGGTAGGTACCGAGAGAAGCGTTGAAACGGTCCTCAACGCCGCTGATCTCGACGGA
GTCGAAGCACTCGATCTTCTTGAAGTAGTCCTCCTTGAGCTGCTTGACGGTGACCTTGCGGTTGGTCTTG
AAGAGGAGGTCAACGATAGCCTTCTTCTGCTCGCCGGAGAGGAAGGCAGGCTTGCGCATACCCTCGGTGA
CGTACTTGACCTTGGTGAGCTCGTTGTAGACCGTGAAGTACTCGTAGAGGAGGGAGTGCTTGGGGAGGAC
CTTCTCGTTGGGGAGGTTCTTGTCGAAGTTGGTCATGCGCTCGATGAAGGACTGGGCGGAAGCACCCTTG
TCAACAACCTCCTCGAAGTTCCAAGGGGTGATAGTCTCCTCGGACTTCCTAGTCATCCAAGCGAAACGGG
AGTTACCACGAGCAAGAGGACCAACGTAGTAAGGAATACGGAAAGTAAGGATCTTCTCGATCTTCTCACG
GTTGTCCTTGAGGAAAGGGTAGAAGTCCTCCTGCCTACGAAGGATGGCGTGAAGCTCACCAAGGTGGATC
TGGTGAGGGATAGAGCCGTTATCGAAAGTCCTCTGCTTCCTAAGGAGGTCCTCACGGTTAAGCTTAACGA
GAAGCTCCTCAGTACCATCCATCTTCTCAAGGATTGGCTTGATGAACTTGTAGAACTCCTCCTGGCTAGC
TCCACCGTCAATGTAACCGGCGTAGCCGTTCTTGGACTGGTCGAAGAAGATCTCCTTGTACTTCTCGGGG
AGCTGCTGACGAACAAGAGCCTTGAGGAGGGTGAGGTCCTGGTGGTGCTCGTCGTAGCGCTTGATCATGG
AAGCAGAAAGAGGAGCCTTAGTGATCTCAGTGTTAACCCTAAGGATATCCGAAAGGAGGATAGCATCGGA
GAGGTTCTTAGCAGCAAGGAAGAGATCAGCGTACTGATCTCCAATCTGAGCGAGGAGGTTGTCGAGATCA
TCGTCGTAGGTATCCTTGGAGAGCTGAAGCTTAGCGTCCTCAGCGAGGTCGAAGTTGGACTTGAAGTTAG
GGGTCAGACCGAGGGAGAGAGCGATGAGGTTACCGAAAAGACCGTTCTTCTTCTCACCAGGGAGCTGGGC
GATGAGGTTCTCGAGACGCCTGGACTTGGAGAGCCTAGCGGAAAGGATCGCCTTAGCGTCGACACCGGAA
GCGTTGATAGGGTTCTCCTCGAAGAGCTGGTTGTAGGTCTGGACGAGCTGGATGAAGAGCTTGTCCACGT
CGGAGTTATCAGGGTTAAGGTCACCCTCGATAAGGAAGTGACCACGGAACTTGATCATGTGAGCGAGAGC
AAGGTAGATGAGACGAAGATCAGCCTTATCAGTAGAGTCAACAAGCTTCTTACGAAGGTGGTAGATAGTG
GGGTACTTCTCGTGGTAGGCGACCTCGTCGACGATGTTGCCGAAGATGGGGTGGCGCTCGTGCTTCTTGT
CCTCCTCCACGAGGAAGGACTCCTCGAGGCGGTGGAAGAAGGAGTCGTCGACCTTCGCCATCTCGTTGGA
GAAGATCTCCTGGAGGTAGCAGATGCGGTTCTTGCGGCGGGTGTAGCGGCGGCGGGCGGTGCGCTTGAGG
CGGGTCGCCTCCGCCGTCTCGCCGGAGTCGAAGAGGAGGGCGCCGATGAGGTTCTTCTTGATGGAGTGGC
GGTCGGTGTTGCCCAGGACCTTGAACTTCTTGGACGGGACCTTGTACTCGTCGGTGATCACCGCCCAGCC
GACGCTGTTGGTGCCGATGTCGAGGCCGATGGAGTACTTCTTGTCAGCCGCAGGCACCCCGTGAATACCA
ACCTTCCGCTTCTTCTTAGGAGCCATGGCTATCGTTCGTAAATGGTGAAAATTTTCAGAAAATTGCTTTT
GCTTTAAAAGAAATGATTTAAATTGCTGCAATAGAAGTAGAATGCTTGATTGCTTGAGATTCGTTTGTTT
TGTATATGTTGTGTTGAGAACTCTCGACGTCCTCTCCAAATGAAATGAACTTCCTTATATAGAGGAAGGG
TCTTGCGAAGGATAGTGGGATTGTGCGTCATCCCTTACGTCAGTGGAGATATCACATCAATCCACTTGCT
TTGAAGACGTGGTTGGAACGTCTTCTTTTTCCACGATGCTCCTCGTGGGTGGGGGTCCATCTTTGGGACC
ACTGTCGGCAGAGGCATCTTCAACGATGGCCTTTCCTTTATCGCAATGATGGCATTTGTAGGAGCCACCT
TCCTTTTCCACTATCTTCACAATAAAGTGACAGATAGCTGGGCAATGGAATCCGAGGAGGTTTCCGGATA
TTACCCTTTGTTGAAAAGTCTCAATTGCCCTTTGGTCTTCTGAGACTGTATCTTTGATATTTTTGGAGTA
GACAAGTGTGTCGTGCTCCACCATGTTATCACATCAATCCACTTGCTTTGAAGACGTGGTTGGAACGTCT
TCTTTTTCCACGATGCTCCTCGTGGGTGGGGGTCCATCTTTGGGACCACTGTCGGCAGAGGCATCTTCAA
CGATGGCCTTTCCTTTATCGCAATGATGGCATTTGTAGGAGCCACCTTCCTTTTCCACTATCTTCACAAT
AAAGTGACAGATAGCTGGGCAATGGAATCCGAGGAGGTTTCCGGATATTACCCTTTGTTGAAAAGTCTCA
ATTGCCCTTTGGTCTTCTGAGACTGTATCTTTGATATTTTTGGAGTAGACAAGTGTGTCGTGCTCCACAT
GTTGACCGGTAAGGCGCGCCGTAGTGCTCGAGAGACCTCTGAAGTGGCCGATTCATTAATGCAGCTGGCA
CGACAGGTTTCCCGACTGGAAAGCGGGCAGTGAGCGCAACGCAATTAATGTGAGTTAGCTCACTCATTAG
GCACCCCAGGCTTTACACTTTATGCTTCCGGCTCGTATGTTGTGTGGAATTGTGAGCGGATAACAATTTC
ACACAAGAAACAGCTATGACCATGATTACGCCAAGCTATTTAGGTGACACTATAGAATACTCAAGCTATG
CATCAAGCTCAATGGGTCTAGTCTGTAGATACCCATCACACTGGCGACCGCTCGAACATCAGTTTAAGGT
TTACACCTATAAAAGAGAGAGCCGTTATCGTCTGTTTGTGGATGTACAGAGTGATATTATTGACACGCCG
GGGCGACGGATGGTGATCCCCCTGGCCAGTGCACGTCTGCTGTCAGATAAAGTCTCCCGTGAACTTTACC
CGGTGGTGCATATCGGGGATGGAAGCTGGCGCATGATGACCACCGATATGGCCAGTGTGCCTGTCTCCGT
TATCGGGGAAGAAGTGGCTGATCTCAGCCACCGCGAAAATGACATCAAAAACGCCATTAACCTGATGTTC
TGGGGAATATAAATGTCAGGCCTGAATGGCGAATGGACGCGCCCTGTAGCGGCGCATTAAGCGCGGCGGG
TGAGCGTGGGTCTCGCGGTATCATTGGCGCGCCTCTCGAGCTAGCGGCCGCATGCATCGATCTCCTACAT
CGTATAAATTAGCCTATACGAAGTTATTGCATCTATGTCGGGTGCGGAGAAAGAGGTAATGAAATGGCAG
TATTAGATCTGATAACTTCGTATAATGTATGCTATACGAAGTTATGACTGCAGGTCGACACCCATAATAG
CTGTTTGCCAAGCTTGGCACTGGCCGTCGTTTTACAACGTCGTGACTGGGAAAACCCTGGCGTTACCCAA
CTTAATCGCCTTGCAGCACATCCCCCTTTCGCCAGCTGGCGTAATAGCGAAGAGGCCCGCACCGATCGCC
CTTCCCAACAGTTGCGCAGCCTGAATGGCGAATGCTAGAGCAGCTTGAGCTTGGATCAGATTGTCGTTTC
CCGCCTTCAGTTTAAACTATCAGTGTTTGACAGGATATATTGGCGGGTAAACCTAAGAGAAAAGAGCGTT
TATTAGAATAATCGGATATTTAAAAGGGCGTGAAAAGGTTTATCCGTTCGTCCATTTGTATGTGCATGCC
AACCACAGGGTTCCCCTCGGGATCAAAGTACTTTGATCCAACCCCTCCGCTGCTATAGTGCAGTCGGCTT
CTGACGTTCAGTGCAGCCGTCTTCTGAAAACGACATGTCGCACAAGTCCTAAGTTACGCGACAGGCTGCC
GCCCTGCCCTTTTCCTGGCGTTTTCTTGTCGCGTGTTTTAGTCGCATAAAGTAGAATACTTGCGACTAGA
ACCGGAGACATTACGCCATGAACAAGAGCGCCGCCGCTGGCCTGCTGGGCTATGCCCGCGTCAGCACCGA
CGACCAGGACTTGACCAACCAACGGGCCGAACTGCACGCGGCCGGCTGCACCAAGCTGTTTTCCGAGAAG
ATCACCGGCACCAGGCGCGACCGCCCGGAGCTGGCCAGGATGCTTGACCACCTACGCCCTGGCGACGTTG
TGACAGTGACCAGGCTAGACCGCCTGGCCCGCAGCACCCGCGACCTACTGGACATTGCCGAGCGCATCCA
GGAGGCCGGCGCGGGCCTGCGTAGCCTGGCAGAGCCGTGGGCCGACACCACCACGCCGGCCGGCCGCATG
GTGTTGACCGTGTTCGCCGGCATTGCCGAGTTCGAGCGTTCCCTAATCATCGACCGCACCCGGAGCGGGC
GCGAGGCCGCCAAGGCCCGAGGCGTGAAGTTTGGCCCCCGCCCTACCCTCACCCCGGCACAGATCGCGCA
CGCCCGCGAGCTGATCGACCAGGAAGGCCGCACCGTGAAAGAGGCGGCTGCACTGCTTGGCGTGCATCGC
TCGACCCTGTACCGCGCACTTGAGCGCAGCGAGGAAGTGACGCCCACCGAGGCCAGGCGGCGCGGTGCCT
TCCGTGAGGACGCATTGACCGAGGCCGACGCCCTGGCGGCCGCCGAGAATGAACGCCAAGAGGAACAAGC
ATGAAACCGCACCAGGACGGCCAGGACGAACCGTTTTTCATTACCGAAGAGATCGAGGCGGAGATGATCG
CGGCCGGGTACGTGTTCGAGCCGCCCGCGCACGTCTCAACCGTGCGGCTGCATGAAATCCTGGCCGGTTT
GTCTGATGCCAAGCTGGCGGCCTGGCCGGCCAGCTTGGCCGCTGAAGAAACCGAGCGCCGCCGTCTAAAA
AGGTGATGTGTATTTGAGTAAAACAGCTTGCGTCATGCGGTCGCTGCGTATATGATGCGATGAGTAAATA
AACAAATACGCAAGGGGAACGCATGAAGGTTATCGCTGTACTTAACCAGAAAGGCGGGTCAGGCAAGACG
ACCATCGCAACCCATCTAGCCCGCGCCCTGCAACTCGCCGGGGCCGATGTTCTGTTAGTCGATTCCGATC
CCCAGGGCAGTGCCCGCGATTGGGCGGCCGTGCGGGAAGATCAACCGCTAACCGTTGTCGGCATCGACCG
CCCGACGATTGACCGCGACGTGAAGGCCATCGGCCGGCGCGACTTCGTAGTGATCGACGGAGCGCCCCAG
GCGGCGGACTTGGCTGTGTCCGCGATCAAGGCAGCCGACTTCGTGCTGATTCCGGTGCAGCCAAGCCCTT
ACGACATATGGGCCACCGCCGACCTGGTGGAGCTGGTTAAGCAGCGCATTGAGGTCACGGATGGAAGGCT
ACAAGCGGCCTTTGTCGTGTCGCGGGCGATCAAAGGCACGCGCATCGGCGGTGAGGTTGCCGAGGCGCTG
GCCGGGTACGAGCTGCCCATTCTTGAGTCCCGTATCACGCAGCGCGTGAGCTACCCAGGCACTGCCGCCG
CCGGCACAACCGTTCTTGAATCAGAACCCGAGGGCGACGCTGCCCGCGAGGTCCAGGCGCTGGCCGCTGA
AATTAAATCAAAACTCATTTGAGTTAATGAGGTAAAGAGAAAATGAGCAAAAGCACAAACACGCTAAGTG
CCGGCCGTCCGAGCGCACGCAGCAGCAAGGCTGCAACGTTGGCCAGCCTGGCAGACACGCCAGCCATGAA
GCGGGTCAACTTTCAGTTGCCGGCGGAGGATCACACCAAGCTGAAGATGTACGCGGTACGCCAAGGCAAG
ACCATTACCGAGCTGCTATCTGAATACATCGCGCAGCTACCAGAGTAAATGAGCAAATGAATAAATGAGT
AGATGAATTTTAGCGGCTAAAGGAGGCGGCATGGAAAATCAAGAACAACCAGGCACCGACGCCGTGGAAT
GCCCCATGTGTGGAGGAACGGGCGGTTGGCCAGGCGTAAGCGGCTGGGTTGCCTGCCGGCCCTGCAATGG
CACTGGAACCCCCAAGCCCGAGGAATCGGCGTGAGCGGTCGCAAACCATCCGGCCCGGTACAAATCGGCG
CGGCGCTGGGTGATGACCTGGTGGAGAAGTTGAAGGCCGCGCAGGCCGCCCAGCGGCAACGCATCGAGGC
AGAAGCACGCCCCGGTGAATCGTGGCAAGCGGCCGCTGATCGAATCCGCAAAGAATCCCGGCAACCGCCG
GCAGCCGGTGCGCCGTCGATTAGGAAGCCGCCCAAGGGCGACGAGCAACCAGATTTTTTCGTTCCGATGC
TCTATGACGTGGGCACCCGCGATAGTCGCAGCATCATGGACGTGGCCGTTTTCCGTCTGTCGAAGCGTGA
CCGACGAGCTGGCGAGGTGATCCGCTACGAGCTTCCAGACGGGCACGTAGAGGTTTCCGCAGGGCCGGCC
GGCATGGCCAGTGTGTGGGATTACGACCTGGTACTGATGGCGGTTTCCCATCTAACCGAATCCATGAACC
GATACCGGGAAGGGAAGGGAGACAAGCCCGGCCGCGTGTTCCGTCCACACGTTGCGGACGTACTCAAGTT
CTGCCGGCGAGCCGATGGCGGAAAGCAGAAAGACGACCTGGTAGAAACCTGCATTCGGTTAAACACCACG
CACGTTGCCATGCAGCGTACGAAGAAGGCCAAGAACGGCCGCCTGGTGACGGTATCCGAGGGTGAAGCCT
TGATTAGCCGCTACAAGATCGTAAAGAGCGAAACCGGGCGGCCGGAGTACATCGAGATCGAGCTAGCTGA
TTGGATGTACCGCGAGATCACAGAAGGCAAGAACCCGGACGTGCTGACGGTTCACCCCGATTACTTTTTG
ATCGATCCCGGCATCGGCCGTTTTCTCTACCGCCTGGCACGCCGCGCCGCAGGCAAGGCAGAAGCCAGAT
GGTTGTTCAAGACGATCTACGAACGCAGTGGCAGCGCCGGAGAGTTCAAGAAGTTCTGTTTCACCGTGCG
CAAGCTGATCGGGTCAAATGACCTGCCGGAGTACGATTTGAAGGAGGAGGCGGGGCAGGCTGGCCCGATC
CTAGTCATGCGCTACCGCAACCTGATCGAGGGCGAAGCATCCGCCGGTTCCTAATGTACGGAGCAGATGC
TAGGGCAAATTGCCCTAGCAGGGGAAAAAGGTCGAAAAGTTCTCTTTCCTGTGGATAGCACGTACATTGG
GAACCCAAAGCCGTACATTGGGAACCGGAACCCGTACATTGGGAACCCAAAGCCGTACATTGGGAACCGG
TCACACATGTAAGTGACTGATATAAAAGAGAAAAAAGGCGATTTTTCCGCCTAAAACTCTTTAAAACTTA
TTAAAACTCTTAAAACCCGCCTGGCCTGTGCATAACTGTCTGGCCAGCGCACAGCCGAAGAGCTGCAAAA
AGCGCCTACCCTTCGGTCGCTGCGCTCCCTACGCCCCGCCGCTTCGCGTCGGCCTATCGCGGCCGCTGGC
CGCTCAAAAATGGCTGGCCTACGGCCAGGCAATCTACCAGGGCGCGGACAAGCCGCGCCGTCGCCACTCG
ACCGCCGGCGCCCACATCAAGGCACCCTGCCTCGCGCGTTTCGGTGATGACGGTGAAAACCTCTGACACA
TGCAGCTCCCGGAGACGGTCACAGCTTGTCTGTAAGCGGATGCCGGGAGCAGACAAGCCCGTCAGGGCGC
GTCAGCGGGTGTTGGCGGGTGTCGGGGCGCAGCCATGACCCAGTCACGTAGCGATAGCGGAGTGTATACT
GGCTTAACTATGCGGCATCAGAGCAGATTGTACTGAGAGTGCACCATATGCGGTGTGAAATACCGCACAG
ATGCGTAAGGAGAAAATACCGCATCAGGCGCTCTTCCGCTTCCTCGCTCACTGACTCGCTGCGCTCGGTC
GTTCGGCTGCGGCGAGCGGTATCAGCTCACTCAAAGGCGGTAATACGGTTATCCACAGAATCAGGGGATA
ACGCAGGAAAGAACATGTGAGCAAAAGGCCAGCAAAAGGCCAGGAACCGTAAAAAGGCCGCGTTGCTGGC
GTTTTTCCATAGGCTCCGCCCCCCTGACGAGCATCACAAAAATCGACGCTCAAGTCAGAGGTGGCGAAAC
CCGACAGGACTATAAAGATACCAGGCGTTTCCCCCTGGAAGCTCCCTCGTGCGCTCTCCTGTTCCGACCC
TGCCGCTTACCGGATACCTGTCCGCCTTTCTCCCTTCGGGAAGCGTGGCGCTTTCTCATAGCTCACGCTG
TAGGTATCTCAGTTCGGTGTAGGTCGTTCGCTCCAAGCTGGGCTGTGTGCACGAACCCCCCGTTCAGCCC
GACCGCTGCGCCTTATCCGGTAACTATCGTCTTGAGTCCAACCCGGTAAGACACGACTTATCGCCACTGG
CAGCAGCCACTGGTAACAGGATTAGCAGAGCGAGGTATGTAGGCGGTGCTACAGAGTTCTTGAAGTGGTG
GCCTAACTACGGCTACACTAGAAGGACAGTATTTGGTATCTGCGCTCTGCTGAAGCCAGTTACCTTCGGA
AAAAGAGTTGGTAGCTCTTGATCCGGCAAACAAACCACCGCTGGTAGCGGTGGTTTTTTTGTTTGCAAGC
AGCAGATTACGCGCAGAAAAAAAGGATCTCAAGAAGATCCTTTGATCTTTTCTACGGGGTCTGACGCTCA
GTGGAACGAAAACTCACGTTAAGGGATTTTGGTCATGCATTCTAGGTACTAAAACAATTCATCCAGTAAA
ATATAATATTTTATTTTCTCCCAATCAGGCTTGATCCCCAGTAAGTCAAAAAATAGCTCGACATACTGTT
CTTCCCCGATATCCTCCCTGATCGACCGGACGCAGAAGGCAATGTCATACCACTTGTCCGCCCTGCCGCT
TCTCCCAAGATCAATAAAGCCACTTACTTTGCCATCTTTCACAAAGATGTTGCTGTCTCCCAGGTCGCCG
TGGGAAAAGACAAGTTCCTCTTCGGGCTTTTCCGTCTTTAAAAAATCATACAGCTCGCGCGGATCTTTAA
ATGGAGTGTCTTCTTCCCAGTTTTCGCAATCCACATCGGCCAGATCGTTATTCAGTAAGTAATCCAATTC
GGCTAAGCGGCTGTCTAAGCTATTCGTATAGGGACAATCCGATATGTCGATGGAGTGAAAGAGCCTGATG
CACTCCGCATACAGCTCGATAATCTTTTCAGGGCTTTGTTCATCTTCATACTCTTCCGAGCAAAGGACGC
CATCGGCCTCACTCATGAGCAGATTGCTCCAGCCATCATGCCGTTCAAAGTGCAGGACCTTTGGAACAGG
CAGCTTTCCTTCCAGCCATAGCATCATGTCCTTTTCCCGTTCCACATCATAGGTGGTCCCTTTATACCGG
CTGTCCGTCATTTTTAAATATAGGTTTTCATTTTCTCCCACCAGCTTATATACCTTAGCAGGAGACATTC
CTTCCGTATCTTTTACGCAGCGGTATTTTTCGATCAGTTTTTTCAATTCCGGTGATATTCTCATTTTAGC
CATTTATTATTTCCTTCCTCTTTTCTACAGTATTTAAAGATACCCCAAGAAGCTAAGGAAGGTGCGAACA
AGTCCCTGATATGAGATCATGTTTGTCATCTGGAGCCATAGAACAGGGTTCATCATGAGTCATCAACTTA
CCTTCGCCGACAGTGAATTCAGCAGTAAGCGCCGTCAGACCAGAAAAGAGATTTTCTTGTCCCGCATGGA
GCAGATTCTGCCATGGCAAAACATGGTGGAAGTCATCGAGCCGTTTTACCCCAAGGCTGGTAATGGCCGG
CGACCTTATCCGCTGGAAACCATGCTACGCATTCACTGCATGCAGCATTGGTACAACCTGAGCGATGGCG
CGATGGAAGATGCTCTGTACGAAATCGCCTCCATGCGTCTGTTTGCCCGGTTATCCCTGGATAGCGCCTT
GCCGGACCGCACCACCATCATGAATTTCCGCCACCTGCTGGAGCAGCATCAACTGGCCCGCCAATTGTTC
AAGACCATCAATCGCTGGCTGGCCGAAGCAGGCGTCATGATGACTCAAGGCACCTTGGTCGATGCCACCA
TCATTGAGGCACCCAGCTCGACCAAGAACAAAGAGCAGCAACGCGATCCGGAGATGCATCAGACCAAGAA
AGGCAATCAGTGGCACTTTGGCATGAAGGCCCACATTGGTGTCGATGCCAAGAGTGGCCTGACCCACAGC
CTGGTCACCACCGCGGCCAACGAGCATGACCTCAATCAGCTGGGTAATCTGCTGCATGGAGAGGAGCAAT
TTGTCTCAGCCGATGCCGGCTACCAAGGGGCGCCACAGCGCGAGGAGCTGGCCGAGGTGGATGTGGACTG
GCTGATCGCCGAGCGCCCCGGCAAGGTAAGAACCTTGAAACAGCATCCACGCAAGAACAAAACGGCCATC
AACATCGAATACATGAAAGCCAGCATCCGGGCCAGGGTGGAGCACCCATTTCGCATCATCAAGCGACAGT
TCGGCTTCGTGAAAGCCAGATACAAGGGGTTGCTGAAAAACGATAACCAACTGGCGATGTTATTCACGCT
GGCCAACCTGTTTCGGGCGGACCAAATGATACGTCAGTGGGAGAGATCTCACTAAAAACTGGGGATAACG
CCTTAAATGGCGAAGAAACGGTCTAAATAGGCTGATTCAAGGCATTTACGGGAGAAAAAATCGGCTCAAA
CATGAAGAAATGAAATGACTGAGTCAGCCGAGAAGAATTTCCCCGCTTATTCGCACCTTCCCTAATTATA
ACAAGACGAACTCCAATTCACTGTTCCTTGCATTCTAAAACCTTAAATACCAGAAAACAGCTTTTTCAAA
GTTGTTTTCAAAGTTGGCGTATAACATAGTATCGACGGAGCCGATTTTGAAACCGCGGTGATCACAGGCA
GCAACGCTCTGTCATCGTTACAATCAACATGCTACCCTCCGCGAGATCATCCGTGTTTCAAACCCGGCAG
CTTAGTTGCCGTTCTTCCGAATAGCATCGGTAACATGAGCAAAGTCTGCCGCCTTACAACGGCTCTCCCG
CTGACGCCGTCCCGGACTGATGGGCTGCCTGTATCGAGTGGTGATTTTGTGCCGAGCTGCCGGTCGGGGA
GCTGTTGGCTGGCTGGTGGCAGGATATATTGTGGTGTAAACAAATTGACGCTTAGACAACTTAATAACAC
ATTGCGGACGTTTTTAATGTACTGAATTAACGCCGAATTAATTCGGGGGATCTGGATTTTAGTACTGGAT
TTTGGTTTTAGGAATTAGAAATTTTATTGATAGAAGTATTTTACAAATACAAATACATACTAAGGGTTTC
TTATATGCTCAACACATGAGCGAAACCCTATAGGAACCCTAATTCCCTTATCTGGGAACTACTCACACAT
TATTATGGAGAAACTCGAGTCAAATCTCGGTGACGGGCAGGACCGGACGGGGCGGTACCGGCAGGCTGAA
GTCCAGCTGCCAGAAACCCACGTCATGCCAGTTCCCGTGCTTGAAGCCGGCCGCCCGCAGCATGCCGCGG
GGGGCATATCCGAGCGCCTCGTGCATGCGCACGCTCGGGTCGTTGGGCAGCCCGATGACAGCGACCACGC
TCTTGAAGCCCTGTGCCTCCAGGGACTTCAGCAGGTGGGTGTAGAGCGTGGAGCCCAGTCCCGTCCGCTG
GTGGCGGGGGGAGACGTACACGGTCGACTCGGCCGTCCAGTCGTAGGCGTTGCGT
